# Supplementary material for: Micro-optical coherence tomography tracking of magnetic gene transfection via Au–Fe3O4dumbbell nanoparticles
Source: Royal Society of Chemistry journal article supplement (doi:10.1039/c5nr05459a), 2015-01-01
Supplement: c5nr05459a1.pdf [file c5nr05459a1.pdf]

Supporting Information for

## Micro-Optical Coherence Tomography Tracking of Magnetic Gene Transfection via Au-Fe<sub>3</sub>O<sub>4</sub> Dumbbell Nanoparticles

Wei Shi<sup>1</sup>, Xinyu Liu<sup>2</sup>, Wei Chao<sup>3</sup>, Zhichuan J. Xu<sup>3</sup>, Stanley Siong Wei Sim<sup>1</sup>, Linbo Liu<sup>1,2,\*</sup>,  
Chenjie Xu<sup>1,4,\*</sup>

<sup>1</sup> School of Chemical and Biomedical Engineering, Nanyang Technological University, 70 Nanyang Drive, Singapore 637457

<sup>2</sup> School of Electrical and Electronic Engineering, Nanyang Technological University, 50 Nanyang Avenue, Singapore 639798

<sup>3</sup> School of Materials Science and Engineering, Nanyang Technological University, 50 Nanyang Avenue, Singapore 639798

<sup>4</sup> NTU-Northwestern Institute of Nanomedicine, Nanyang Technological University, 50 Nanyang Avenue, Singapore 639798

\* Correspondence to [cjxu@ntu.edu.sg](mailto:cjxu@ntu.edu.sg); [liulinbo@ntu.edu.sg](mailto:liulinbo@ntu.edu.sg)

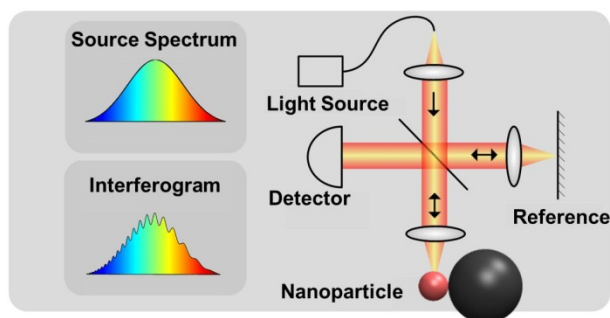

**Figure S1:** Schematic of  $\mu$ OCT

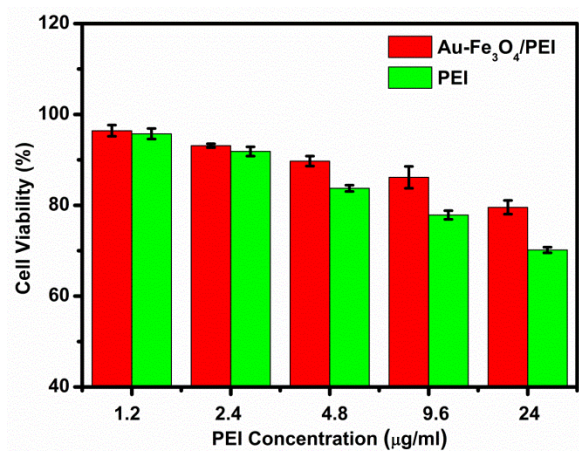

**Figure S2:** Cytotoxicity study of Au-Fe<sub>3</sub>O<sub>4</sub>/PEI NPs and PEI with HEK 293T cells with the 24 hour incubation
